# Supplementary figures and images for: Adsorption of Arsenic, Lead, Cadmium, and Chromium Ions from Aqueous Solution Using a Protonated Chabazite: Preparation, Characterization, and Removal Mechanism
Source: Hindawi journal article supplement (doi:10.1155/2023/2018121), 2023-01-01

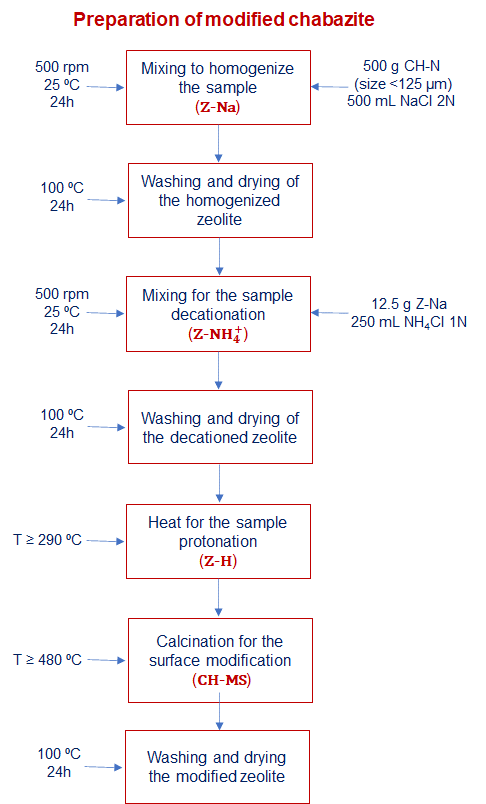

Supplement: f1 [file 2018121.f1.docx]
